# Supplementary material
Source: PubMed Central journal article supplement (PMC4715237)

**Web Figure 1.** Timeline of enrollment of index cases with influenza B Yamagata- or Victoria-lineage virus infections.

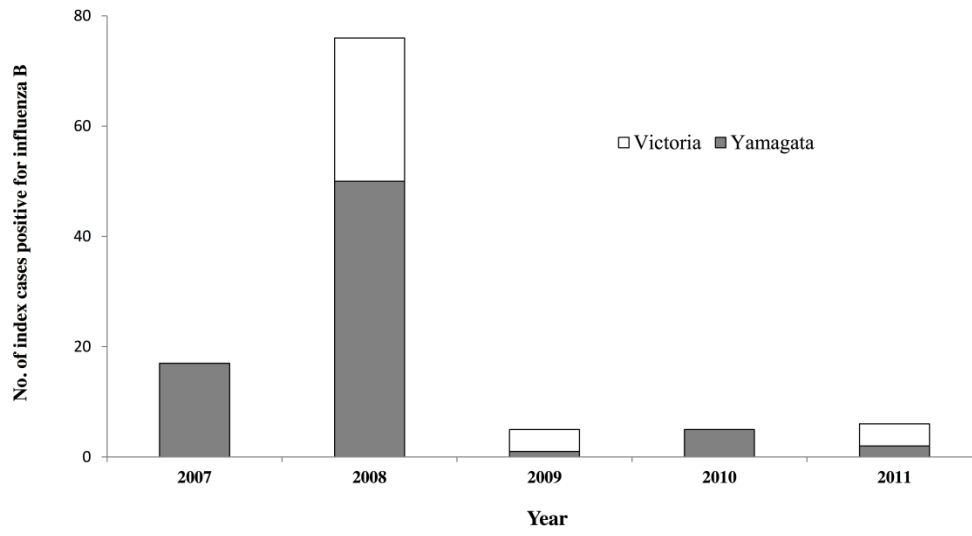

**Web Table 1.** Numbers and Percentages of Household Contacts Infected with Influenza B Yamagata- and Victoria-Lineage Viruses, According to Characteristics of Index Cases and Household Contacts

| Category                            | Yamagata-Lineage Viruses  |                       |                | Victoria-Lineage Viruses  |                       |                |
|-------------------------------------|---------------------------|-----------------------|----------------|---------------------------|-----------------------|----------------|
|                                     | No. of Household Contacts | No. (%) of Infections | <i>P</i> Value | No. of Household Contacts | No. (%) of Infections | <i>P</i> Value |
| <i>Household Contacts</i>           |                           |                       |                |                           |                       |                |
| <b>Age, years</b>                   |                           |                       | 0.19           |                           |                       | <0.001         |
| >15                                 | 149                       | 11 (7)                |                | 80                        | 3 (4)                 |                |
| ≤15                                 | 28                        | 3 (11)                |                | 14                        | 8 (57)                |                |
| <b>Sex</b>                          |                           |                       | 0.39           |                           |                       | 0.33           |
| <b>Female</b>                       | 119                       | 10 (8)                |                | 63                        | 9 (14)                |                |
| <b>Male</b>                         | 62                        | 4 (6)                 |                | 31                        | 2 (6)                 |                |
| <b>Intervention</b>                 |                           |                       | 0.39           |                           |                       | 0.11           |
| <b>Yes</b>                          | 87                        | 9 (10)                |                | 57                        | 4 (7)                 |                |
| <b>No</b>                           | 94                        | 5 (5)                 |                | 39                        | 7 (18)                |                |
| <b>Vaccination in the past year</b> |                           |                       |                |                           |                       | 0.99           |
| <b>No</b>                           | 156                       | 14 (9)                |                | 85                        | 10 (12)               |                |
| <b>Yes</b>                          | 25                        | 0 (0)                 |                | 11                        | 1 (9)                 |                |
| <i>Index Cases</i>                  |                           |                       |                |                           |                       |                |
| <b>Age, years</b>                   |                           |                       | 0.39           |                           |                       |                |
| >15                                 | 61                        | 3 (5)                 |                | 18                        | 0 (0)                 |                |
| ≤15                                 | 120                       | 11 (9)                |                | 76                        | 11 (14)               |                |
| <b>Sex</b>                          |                           |                       | 0.39           |                           |                       | 0.80           |
| <b>Female</b>                       | 116                       | 8 (7)                 |                | 49                        | 6 (12)                |                |
| <b>Male</b>                         | 65                        | 6 (9)                 |                | 45                        | 5 (11)                |                |
| <b>Antiviral treatment</b>          |                           |                       | 0.39           |                           |                       | 0.61           |
| <b>No</b>                           | 115                       | 9 (8)                 |                | 79                        | 9 (11)                |                |
| <b>Yes</b>                          | 47                        | 5 (11)                |                | 15                        | 2 (13)                |                |

**Web Figure 2.** Patterns of viral shedding and course of illness in household contacts infected with influenza B Yamagata- or Victoria-lineage viruses. Panels A and B show the geometric mean viral load (solid lines) upon RT-PCR assay for household contacts infected with Victoria-lineage and Yamagata-lineage virus, respectively. The lower limit of detection for the RT-PCR assay was approximately 900 copies per mL (horizontal dashed lines). Panels C and D show the mean numbers of lower respiratory, upper respiratory, and systemic symptoms in household contacts infected with Victoria-lineage and Yamagata-lineage virus, respectively. The mean numbers of symptoms were calculated from a composite of three groups of influenza signs and symptoms and rescaled to range from 0 to 1, with higher scores indicating a greater number of symptoms. In all panels, the onset of acute respiratory illness was defined as the self-reported day of illness onset before recruitment into the study.

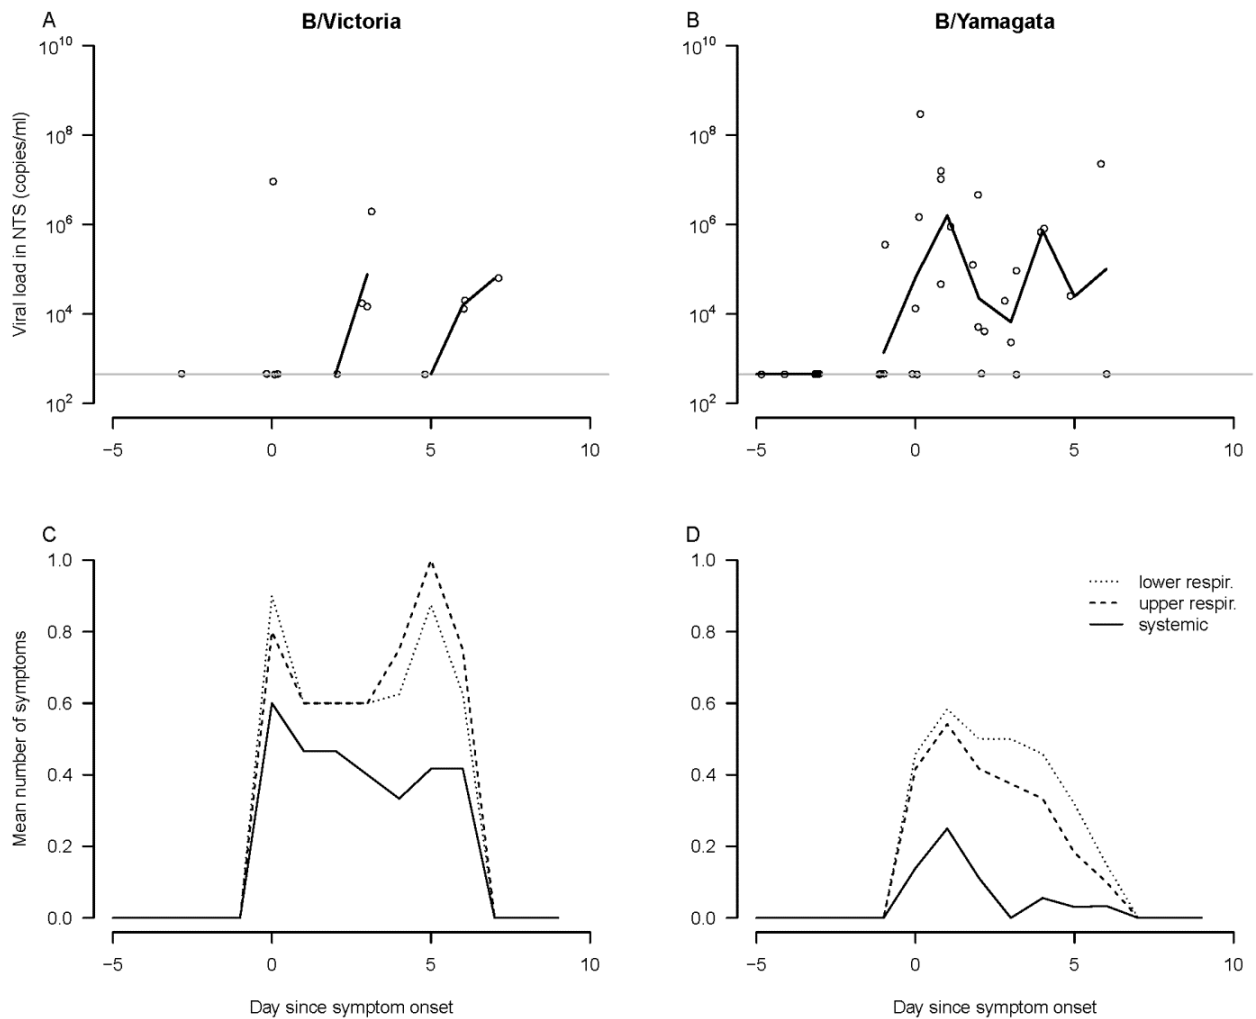

Supplement: supp_kwv110_kwv110supp.pdf [file supp_kwv110_kwv110supp.pdf]
